# Supplementary material for: Analysis of miRNAs and their target genes associated with lipid metabolism in duck liver
Source: PubMed Central journal article supplement (PMC4897641; doi:10.1038/srep27418), 2016-06-08
Supplement: srep27418-s1.pdf [file srep27418-s1.pdf]

# Analysis of miRNAs and their target genes associated with lipid metabolism in duck liver

Jun He<sup>1,2</sup>, Weiqun Wang<sup>3</sup>, Lizhi Lu<sup>2</sup>, Yong Tian<sup>2</sup>, Dong Niu<sup>4</sup>, Jindong Ren<sup>2,5</sup>, Liyan Dong<sup>1,2</sup>, Siwei

Sun<sup>1</sup>, Yan Zhao<sup>1</sup>, Guoqin Li<sup>2</sup>, Jianliang Shen<sup>5</sup>, Xiuhong Li<sup>1\*</sup>

<sup>1</sup>Department of Animal Science, Wenzhou Vocational College of Science & Technology, Wenzhou 325006, P. R. China.

<sup>2</sup>Institute of Animal Husbandry and Veterinary Science, Zhejiang Academy Agricultural Sciences, Hangzhou 310021, P.

R. China. <sup>3</sup>Department of Human Nutrition, Kansas State University, Manhattan, Kansas, 66506, USA. <sup>4</sup>College of

Animal Science, Zhejiang University, Hangzhou 310021, P. R. China. <sup>5</sup>Zhejiang Zhuowang Agriculture Sci-Tech Limited

Co., Huzhou 313014, P. R. China. \*Correspondence and requests for materials should be addressed to X. L. (email:

lixihong\_wky@163.com)

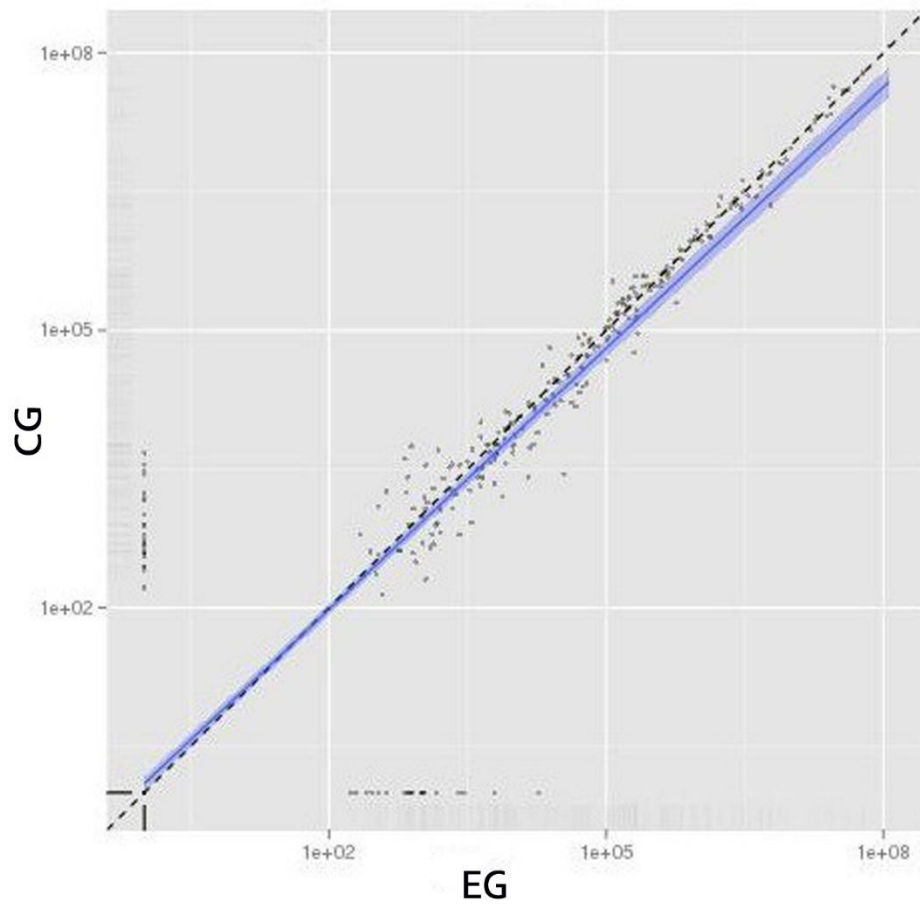

Supplementary Figure S1. Scatter plot (b) of the miRNA expression comparisons between control group (CG) and experimental group (EG). Differences were considered significant at adj.  $P \leq 0.01$ .

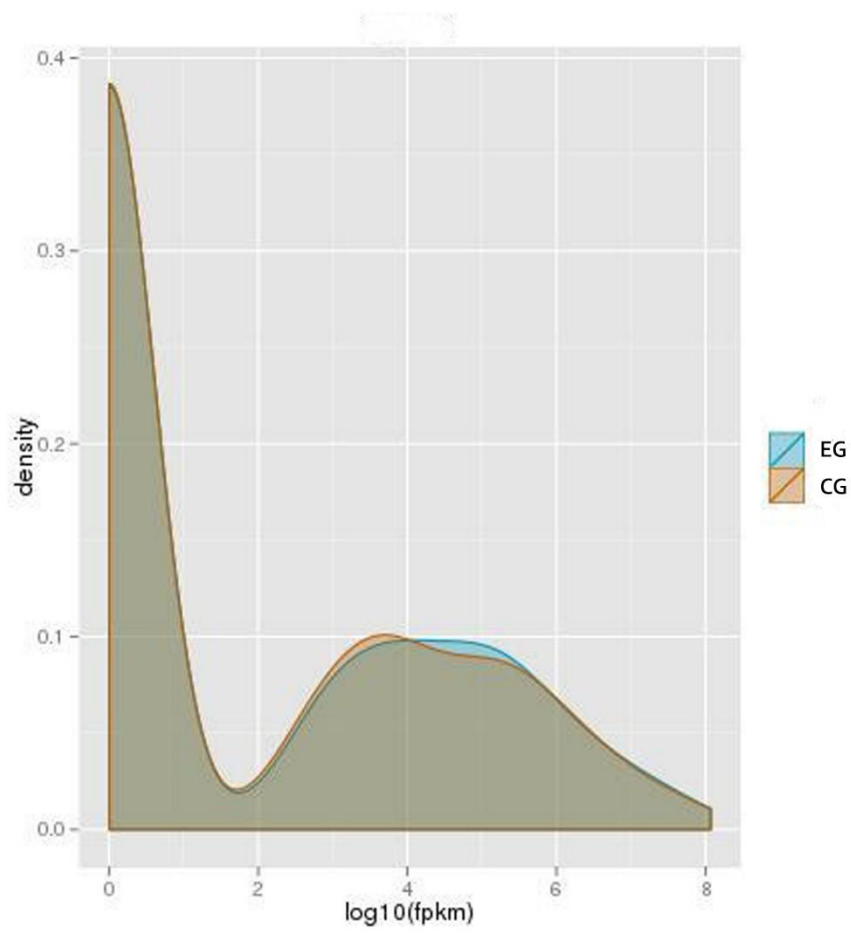

Supplementary Figure S2. miRNA expression density distributions in CG and EG livers

(a)

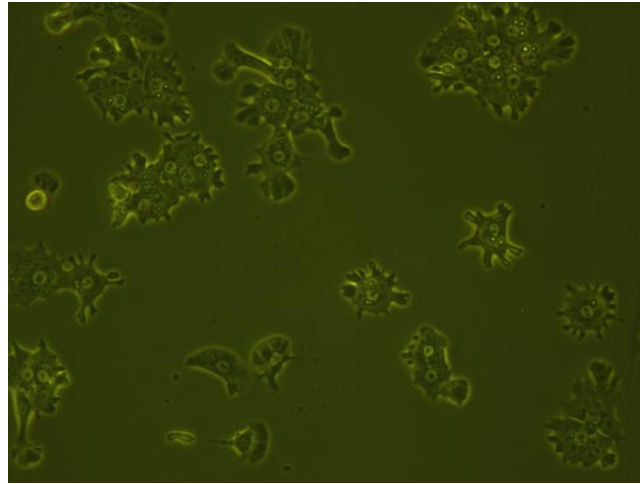

(b)

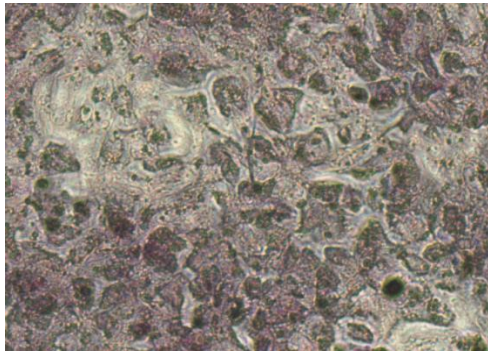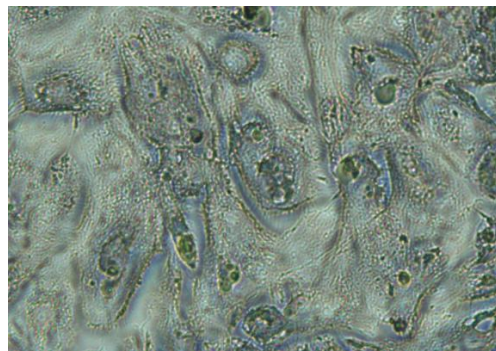

+

-

(c)

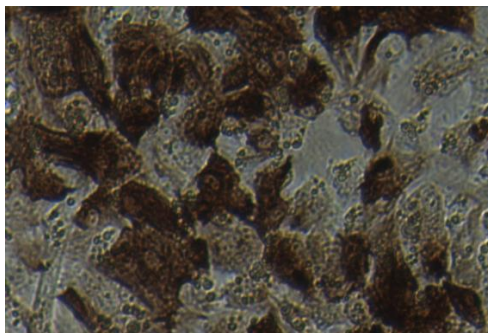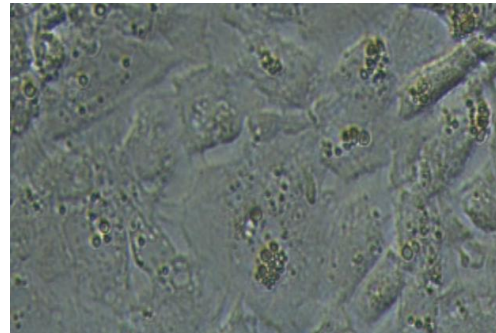

+

-

Supplementary Figure S3. Isolation (a) and identification (b and c) of duck hepatocytes. Hepatocytes were isolated for Cherry-Valley duck (age of 1 week) following the method of Seglen (1976). Periodic acid-Schiff stain (b) and immunohistochemistry (c) with Anti-Cytokeratin 18 antibody (Abcam, UK) were performed to identify the isolated duck hepatocytes following the producers' protocols.
